# Supplementary material
Source: PubMed Central journal article supplement (PMC6487504)
Supplement: NIHMS1522466-supplement-1.pdf [file NIHMS1522466-supplement-1.pdf]

1 **Supplementary Information**

2

3 **Supplementary Figures**

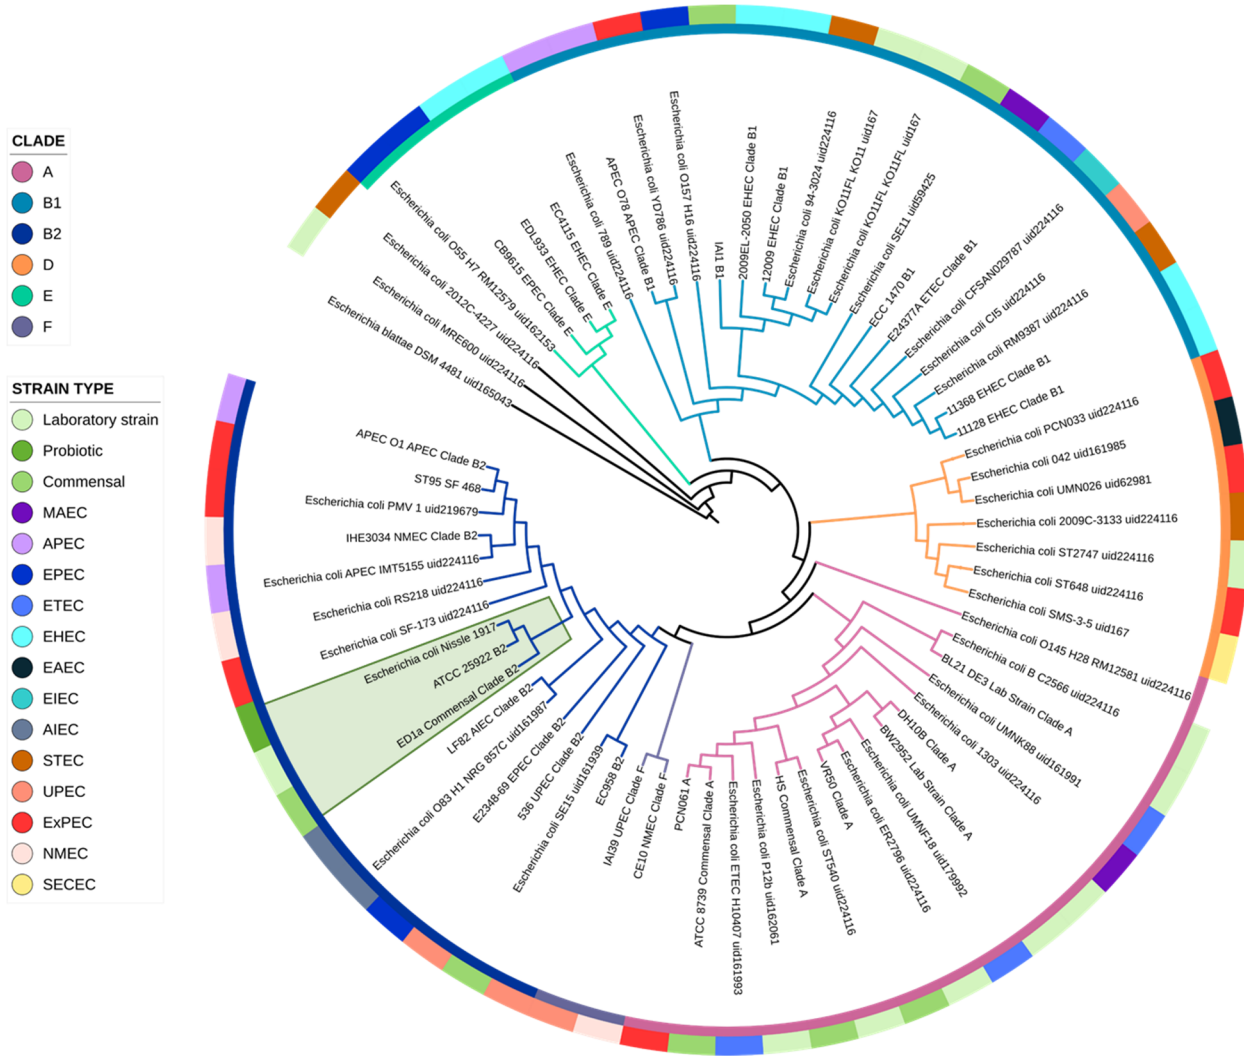

4

5 **Figure S1. Phylogeny of *Escherichia* strains. Related to Figure 1. Maximum likelihood**

6 phylogeny of representative *Escherichia* strains annotated by clade (inner track, branches) and by

7 strain type (outer track).

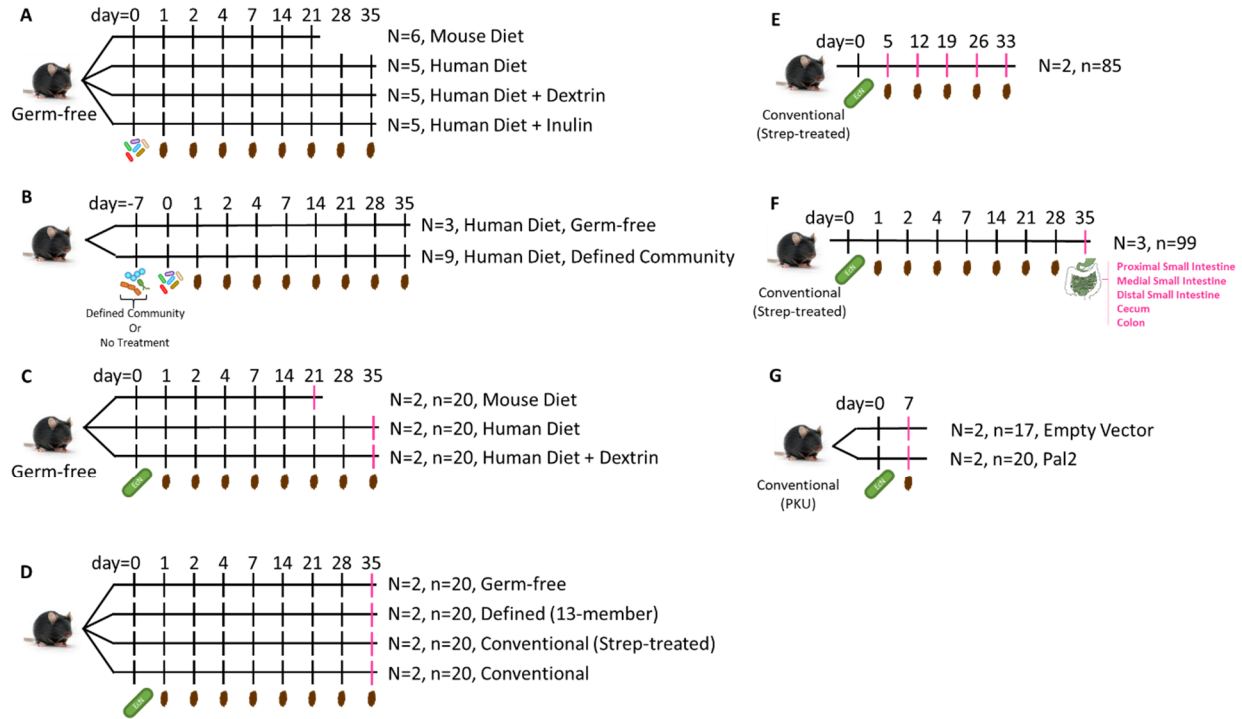

8

9 **Figure S2. Schematic of *in vivo* functional metagenomic selections and adaptation**

10 **experiments. Related to Table 1, Figures 1-3, and Figures 5-6.** Experimental design and

11 sampling timelines for A) functional metagenomic selections in germ-free mice B) functional

12 metagenomic selections in mice pre-colonized with a defined community, C) genomic adaptation

13 experiments in mice fed different diets, D) genomic adaptation experiments in mice with different

14 gut microbiota complexities, E) longitudinal analysis of genomic adaptation in conventional,

15 streptomycin treated mice, F) analysis of adaptations specific to gut sites, and G) genomic

16 adaptation experiments in Pahenu2 mutant mice (PKU model) that were treated with EcN

17 harboring either empty vector or the Pal2 gene. Mice were gavaged with EcN on day 0. N: number

18 of replicate mice, n: total number of sequenced isolates. Pink bars: sampling time point from which

19 EcN isolates were harvested. Mice with a defined community were pre-colonized 7 days before

20 EcN Gavage.

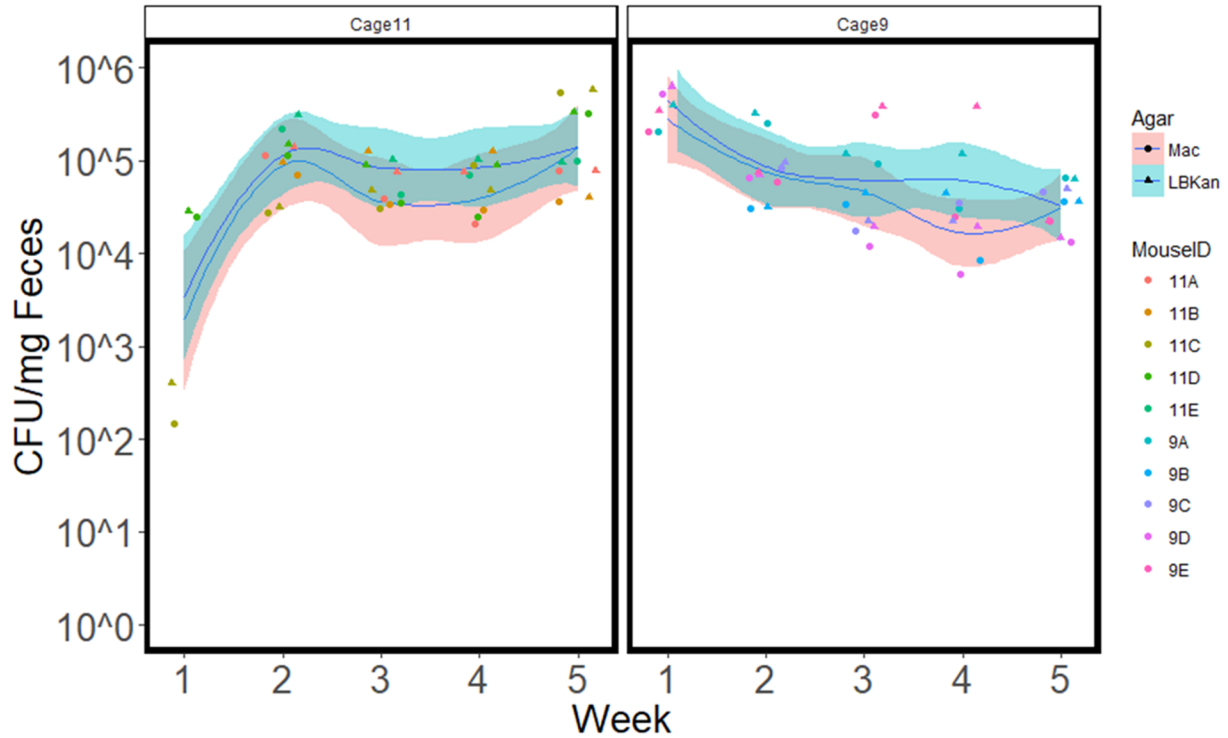

21

22 **Figure S3. Assessment of *in vivo* plasmid loss. Related to Figure 1.** CFUs/mg of EcN recovered  
 23 from mouse fecal samples over 5 weeks when plated either on MacConkey agar (selects for all  
 24 EcN) or LB agar with Kanamycin (selects for EcN containing pZE21). Shaded regions represent  
 25 95% confidence intervals of LOESS regressions on the data. 10 mice from two different cages  
 26 were sampled.

27

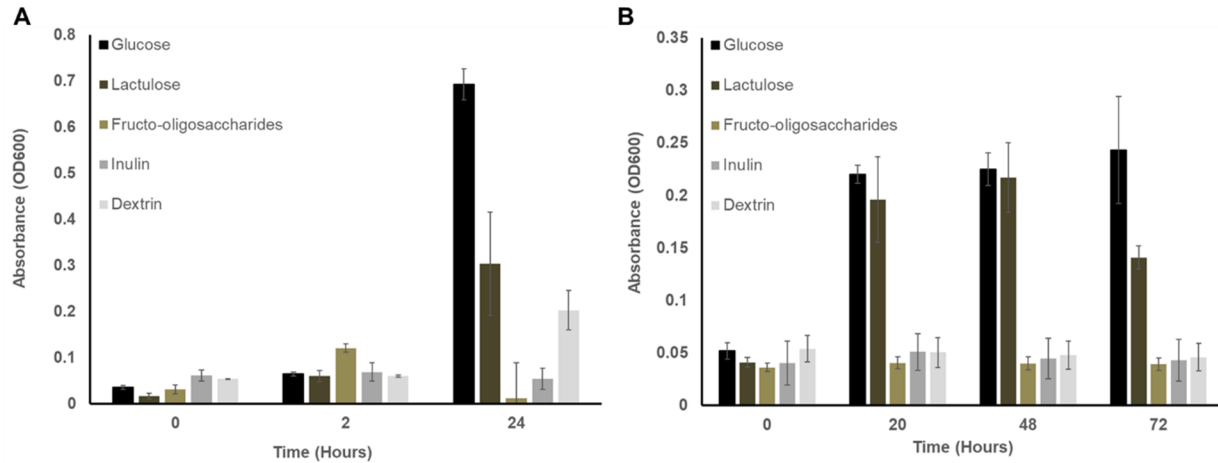

28

29 **Figure S4. Growth of wild type EcN on mono- and polysaccharides. Related to Figures 1-3.**

30 *In vitro* growth of EcN on minimal media supplemented with the monosaccharides glucose or

31 lactulose, or with various polysaccharides under aerobic (**A**) and anaerobic (**B**) conditions. Shown

32 are means of 3 replicates. Error bars are one standard deviation above and below the mean.

33

34

35

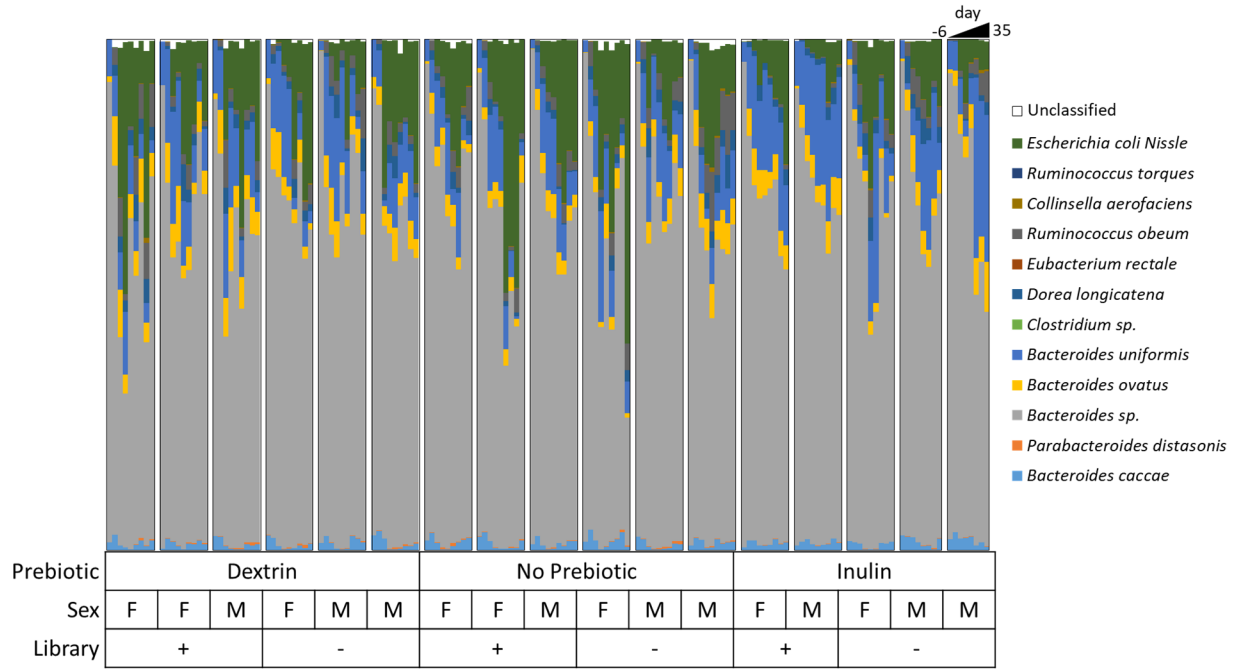

36

37 **Figure S5. Relative taxonomic abundances from gnotobiotic mice humanized with a defined**  
 38 **13-member community. Related to Figure 3.** gDNA from longitudinal fecal samples was  
 39 analyzed by 16S rRNA sequencing. Mice were fed a Human Diet, and in some arms were  
 40 supplemented with prebiotic in the drinking water. One week after humanization with the 13-  
 41 member community, mice were gavaged with EcN containing either empty pZE21 vector ( -  
 42 Library) or the functional metagenomic library (+ Library).

A

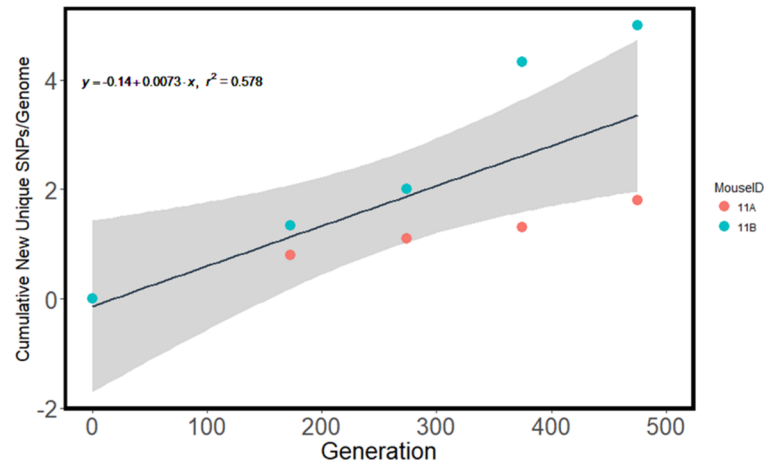

B

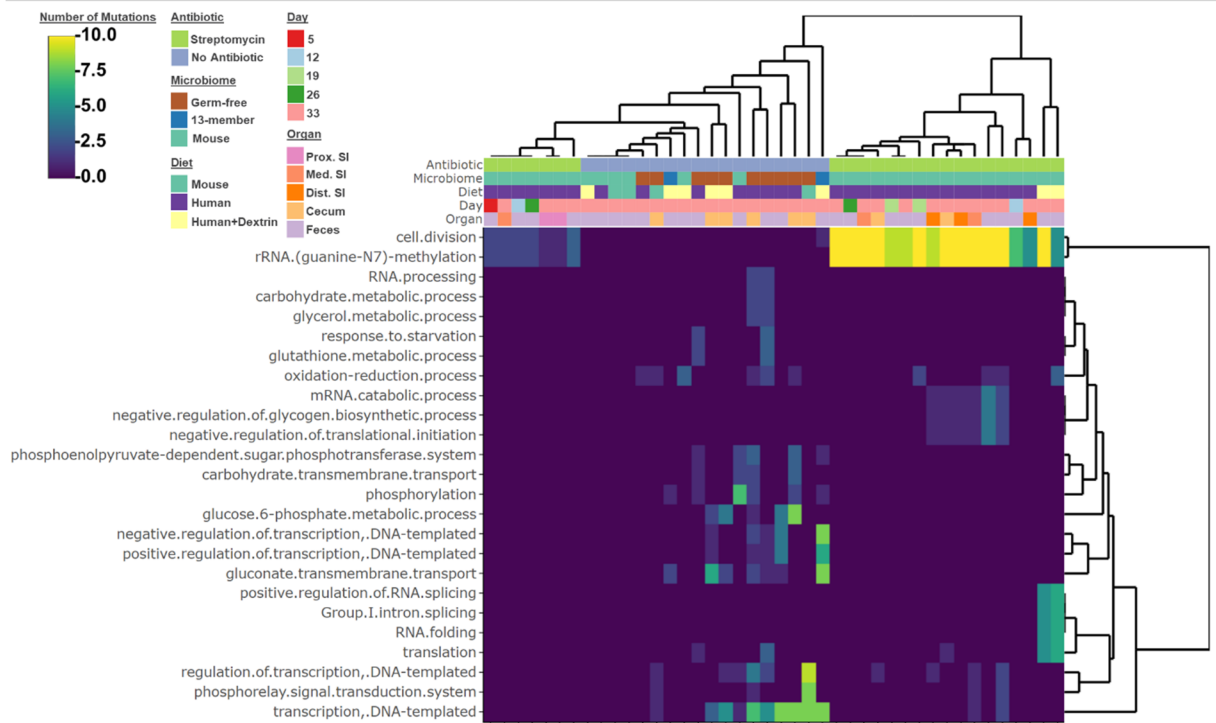

43

44 **Figure S6. Estimation of *in vivo* mutation rate and comparison of functions mutated in EcN**  
 45 **after passage through mice with a range of gut microbiome complexities and fed different**  
 46 **diets. Related to Figure 4. A) Regression of SNP accumulation on number of bacterial**  
 47 **generations. New unique SNPs detected in EcN isolates from fecal samples collected weeks 2-5**

48 after gavage from two streptomycin treated mice are plotted against number of generations, where  
49 the *in vivo* generation time is assumed to be 100 minutes (Rang et al., 1999), and the number of  
50 SNPs at time 0 is assumed to be 0. 10 isolates per mouse per timepoint were whole-genome  
51 sequenced for SNP detection. The shaded area represents the 95% confidence interval of a linear  
52 regression of new unique SNPs/genome on generation. The estimated mutation rate of 0.007 ( $\pm$   
53 0.002) mutations per genome per generation is on the same order of magnitude as the previously  
54 published rate of 0.001 new SNPs per genome per generation (Lee et al., 2012). **B)** Heatmap of  
55 the cumulative number of nonsynonymous SNPs detected in genes grouped by their GO terms.  
56 Inclusion criteria for the heatmap was any function with at least two cumulative mutations  
57 identified across isolates from at least two mice. Dendrograms represent the clustering applied to  
58 group similar rows/columns of the heatmap. With 168 mutations, the GO pathway for Cell  
59 Division was the most commonly-mutated, but it should be noted that this GO pathway was almost  
60 entirely (165/168 mutations) composed of the ribosomal genes mutated during streptomycin  
61 treatment. The next most abundant pathways were transcription (57 mutations), regulation of  
62 transcription (23 genes), and gluconate transmembrane transport (22 mutations).

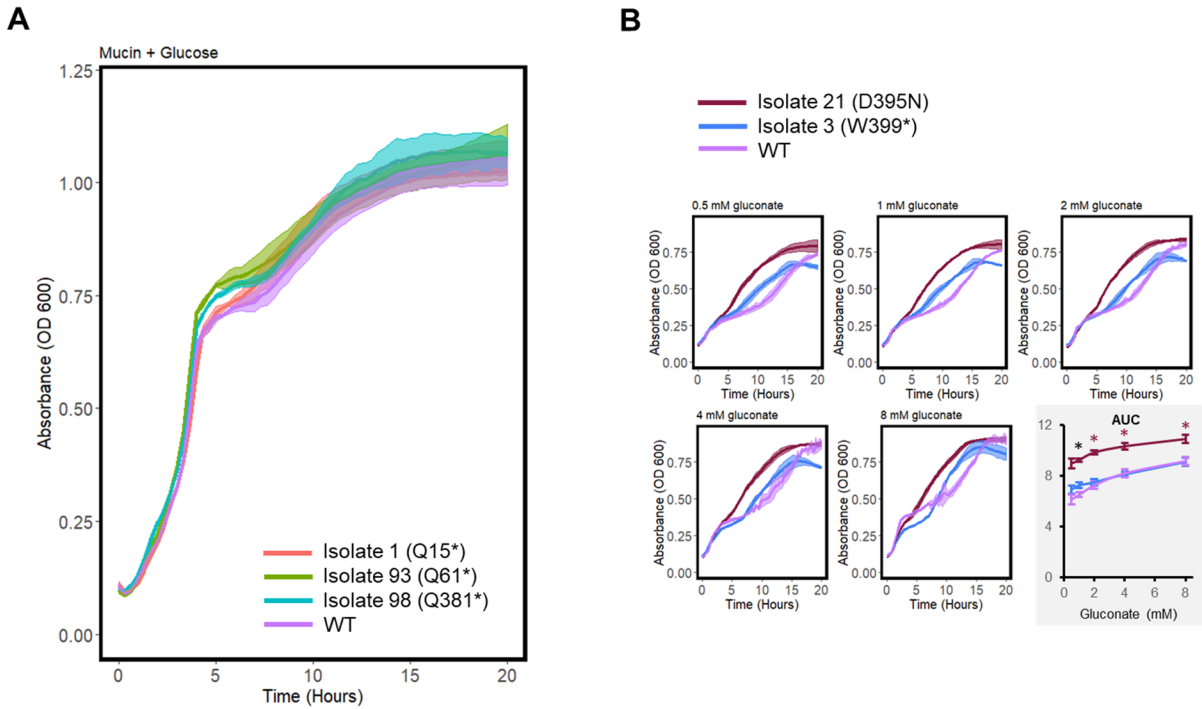

63

64 **Figure S7. Growth of *NagC* and *gntT* mutants on mucin-containing minimal medias. Related**

65 **to Figure 5. A) Diauxic growth curves of *NagC* mutants on glucose and porcine gastric mucin**

66 **minimal media. B) Growth curves of *gntT* mutants on porcine gastric mucin minimal media**

67 **supplemented with either 0.5, 1, 2, 4, or 8 mM gluconate. The gray panel summarizes the growth**

68 **via the areas under the curves (AUC) for each gluconate concentration. N = 3, \* P < 0.05, Welch's**

69 **t-tests, Benjamini-Hochberg correction for multiple comparisons. Black stars indicate that both**

70 **Isolate 3 and Isolate 21 had a significantly greater AUC at a given gluconate concentration; red –**

71 **only Isolate 21. Areas under the curves were calculated using the growthcurver R package.**

72 **Supplementary Tables**

73 **Table S1. Comparison of nutrient compositions of the standard Mouse Chow diet**

74 **(Laboratory Rodent Diet 5001\*, LabDiet) and the High-fat ('Human') Diet (TD.88137,**

75 **Teklad). Related to Table 1.**



|               | Mouse Chow  |             | High-fat ('Human') Diet |             |
|---------------|-------------|-------------|-------------------------|-------------|
|               | % By Weight | % kcal from | % By Weight             | % kcal from |
| Protein       | 24.1        | 28.7        | 17.3                    | 15.2        |
| Fat           | 11.4        | 13.4        | 21.2                    | 42          |
| Carbohydrates | 48.7        | 57.9        | 48.5                    | 42.7        |
| kcal/gm       | 2.89        |             | 4.50                    |             |

76

77 **Table S2. Comparison of formulaic compositions of the standard Mouse Chow diet**  
78 **(Laboratory Rodent Diet 5001\*, LabDiet) and the High-fat ('Human') Diet (TD.88137,**  
79 **Teklad). Related to Table 1.** Ingredients are listed in order of most to least abundant by weight.

| Mouse Chow                 | High-fat ('Human') Diet |
|----------------------------|-------------------------|
| Ground Corn                | Sucrose                 |
| Dehulled Soybean Meal      | Anhydrous Milk Fat      |
| Dried Plain Beet Pulp      | Casein                  |
| Fish Meal                  | Corn Starch             |
| Ground Oats                | Cellulose               |
| Dehydrated Alfalfa Meal    | Mineral Mix             |
| Brewers Dried Yeast        | Vitamin Mix             |
| Cane Molasses              | Calcium Carbonate       |
| Wheat Germ                 | DL-Methionine           |
| Dried Whey                 | Cholesterol             |
| Porcine Animal Fat         | Ethoxyquin              |
| Porcine Meat and Bone Meal |                         |
| Wheat Middlings            |                         |
| Salt                       |                         |

|                   |  |
|-------------------|--|
| Calcium Carbonate |  |
| Vitamin Mix       |  |
| Mineral Mix       |  |

80

81 **Table S3. Summary of *in vivo* adapted EcN isolates. Related to Figure 4.**

| Microbiome  | pZE21 Plasmid Insert | Diet          | Organ    | Day | # Isolates | # Mice |
|-------------|----------------------|---------------|----------|-----|------------|--------|
| None        | Metagenomic          | Human         | Cecum    | 35  | 20         | 2      |
| None        | Metagenomic          | Human         | Cecum    | 35  | 20         | 2      |
| None        | Metagenomic          | Human+Dextrin | Cecum    | 35  | 20         | 2      |
| None        | Metagenomic          | Mouse         | Cecum    | 21  | 20         | 2      |
| None        | No insert            | Human         | Feces    | 35  | 20         | 2      |
| 13-member   | No insert            | Human+Dextrin | Feces    | 35  | 20         | 2      |
| Mouse+strep | No insert            | Human         | Prox. SI | 35  | 2          | 2      |
| Mouse+strep | No insert            | Human         | Med. SI  | 35  | 22         | 3      |
| Mouse+strep | No insert            | Human         | Dist. SI | 35  | 25         | 3      |
| Mouse+strep | No insert            | Human         | Cecum    | 35  | 20         | 2      |
| Mouse+strep | No insert            | Human         | Colon    | 35  | 30         | 3      |
| Mouse+strep | No insert            | Human         | Feces    | 5   | 5          | 1      |
| Mouse+strep | No insert            | Human         | Feces    | 12  | 20         | 2      |
| Mouse+strep | No insert            | Human         | Feces    | 19  | 20         | 2      |
| Mouse+strep | No insert            | Human         | Feces    | 26  | 20         | 2      |
| Mouse+strep | No insert            | Human         | Feces    | 33  | 20         | 2      |
| Mouse+strep | No insert            | Human+Dextrin | Feces    | 35  | 20         | 2      |
| Mouse       | No insert            | Human         | Feces    | 35  | 20         | 2      |
| Mouse       | No insert            | Human+Dextrin | Feces    | 35  | 20         | 2      |
| PKU Mouse   | No insert            | Mouse         | Feces    | 35  | 17         | 2      |
| PKU Mouse   | PAL2                 | Mouse         | Feces    | 35  | 20         | 2      |

82

83 **Table S4. Taxonomic composition of the 13-member defined bacterial community (Goodman**  
84 **et al., 2011). Related to Table 1.**

| Species            | ATCC/DSMZ   |
|--------------------|-------------|
| Bacteroides caccae | ATCC 43185T |

|                            |                              |
|----------------------------|------------------------------|
| Parabacteroides distasonis | ATCC 8503                    |
| Bacteroides novel WH2      | A. Salyers strain collection |
| Bacteroides ovatus         | ATCC 8483T                   |
| Bacteroides uniformis      | ATCC 8492                    |
| Bacteroides vulgatus       | ATCC 8482                    |
| Clostridium scindens       | ATCC 35704                   |
| Clostridium symbiosum      | ATCC 14940                   |
| Dorea longicatena          | DSM 13814                    |
| Eubacterium rectale        | ATCC 33656                   |
| Ruminococcus obeum         | ATCC 29174                   |
| Collinsella aerofaciens    | ATCC 25986                   |
| Ruminococcus torques       | ATCC 27756                   |

85

86 **Table S5: Putative phage regions in the EcN genome. Related to Figure 4.**

| REGION_LENGTH | SPECIFIC_KEYWORD                           | REGION_POSITION |
|---------------|--------------------------------------------|-----------------|
| 18.8Kb        | transposase,terminase                      | 276890-295730   |
| 45.5Kb        | transposase,lysis,head,capsid,tail         | 1325775-1371307 |
| 59Kb          | tail,head,portal,terminase,lysin,integrase | 2011601-2070656 |
| 12.5Kb        | integrase,capsid,head                      | 2535374-2547895 |
| 38.8Kb        | integrase,transposase,tail                 | 3318001-3356837 |

87

88 **Table S6: Primers. Related to Figures 1-3 and Figure 4.**

| Primer # | Primer Name            | Primer Sequence           |
|----------|------------------------|---------------------------|
| 1        | pZE21_79_102For        | CCGAATTCATTAAGAGGAGAAAG   |
| 2        | pZE21_80_103For        | CGAATTCATTAAGAGGAGAAAGG   |
| 3        | pZE21_81_106For        | GAATTCATTAAGAGGAGAAAGGTAC |
| 4        | pZE21_126_149rc<br>Rev | GATATCAAGCTTATCGATACCGTC  |
| 5        | pZE21_128_150rc<br>Rev | CGATATCAAGCTTATCGATACCG   |
| 6        | pZE21_129_151rc<br>Rev | TCGATATCAAGCTTATCGATACC   |

|    |                |                                                               |
|----|----------------|---------------------------------------------------------------|
| 7  | Barcode1       | /5Phos/ANNNNNNGATCGGAAGAGCGGTTTCAGCAGGAATGCCGAG               |
| 8  | Barcode2       | ACACTCTTTCCTACACGACGCTCTTCCGATCTNNNNNNN*T                     |
| 9  | IlluminaPEAmpF | AATGATACGGCGACCACCGAGATCTACACTCTTTCCTACACGACGCTCTTCCGATCT     |
| 10 | IlluminaPEAmpR | CAAGCAGAAGACGGCATAACGAGATCGGTCTCGGCATTCTGCTGAACCGCTCTTCCGATCT |

89

90 **Table S7: Mutations in pZE21. Related to Figure 4**

| Position | Type of mutation                  | Mutation        | # isolates | # mice | # cages |
|----------|-----------------------------------|-----------------|------------|--------|---------|
| 74       | intergenic (in ori)               | G→T             | 1          | 1      | 1       |
| 295      | intergenic (between kanR and ori) | G→T             | 1          | 1      | 1       |
| 313      | intergenic (between kanR and ori) | G→T             | 3          | 2      | 1       |
| 386      | intergenic (between kanR and ori) | G→T             | 1          | 1      | 1       |
| 480      | intergenic (between kanR and ori) | C→A             | 1          | 1      | 1       |
| 532      | intragenic (in kanR)              | P249P (CCC→CCA) | 7          | 3      | 2       |
| 648      | intragenic (in kanR)              | R211R (CGG→AGG) | 1          | 1      | 1       |
| 742      | intragenic (in kanR)              | P179P (CCC→CCA) | 3          | 1      | 1       |
| 802      | intragenic (in kanR)              | D159E (GAC→GAA) | 1          | 1      | 1       |
| 805      | intragenic (in kanR)              | L158L (CTG→CTT) | 1          | 1      | 1       |
| 890      | intragenic (in kanR)              | T130N (ACC→AAC) | 3          | 2      | 1       |
| 963      | intragenic (in kanR)              | H106N (CAC→AAC) | 1          | 1      | 1       |
| 1,019    | intragenic (in kanR)              | A87E (GCG→GAG)  | 1          | 1      | 1       |
| 1,085    | intragenic (in kanR)              | A65V (GCG→GTG)  | 1          | 1      | 1       |
| 1,372    | intergenic (upstream of promoter) | G→T             | 1          | 1      | 1       |
| 1,440    | intergenic (upstream of promoter) | T→C             | 1          | 1      | 1       |
| 1,482    | intergenic (upstream of promoter) | G→T             | 1          | 1      | 1       |
| 1,558    | intergenic (in promoter)          | G→T             | 1          | 1      | 1       |
| 1,681    | intergenic (in terminator)        | G→T             | 1          | 1      | 1       |
| 1,717    | intergenic (in terminator)        | G→T             | 1          | 1      | 1       |

91 The kanR mutations could have been accumulated during growth in selective media prior to  
92 delivery. As all kanamycin was removed from the gavage bolus by 3 washes in PBS, no antibiotic  
93 selection was present during growth *in vivo*. Further, these isolates were from mice never treated  
94 with streptomycin, eliminating cross-resistance as a possible explanation. No inactivating  
95 mutations in kanR were observed, potentially limited by the fact that kanamycin was used to  
96 recover EcN from fecal and intestinal contents.
